# Supplementary material for: Meflin-positive cancer-associated fibroblasts enhance tumor response to immune checkpoint blockade
Source: Life Sci Alliance. 2022 Mar 1;5(6):e202101230. doi: 10.26508/lsa.202101230 (PMC8897596; doi:10.26508/lsa.202101230)
Supplement: Supplementary file 3 [file LSA-2021-01230_SdataF3.xlsx]

## Sheet: B
Score	n
<5	9
5	20
10	12
15	5
20	7
25	20
30-	15

## Sheet: Raw
	Age	Gen	Sex	ST	EGFRm	T	TT	N	Stage	OPE	Recurrence	TTP(m)	Prog	end	OS(m)	death	censor	S	H/L	remarks
1	67	1	0	1	0	1c	1	0	1	2010-01-04	2011-08-05	19.0027	1	2013-01-08	36.1644	1		30	1
3	71	2	1	1	1	2a	2	0	1	2010-01-06	2013-11-20	46.4877	1	2016-03-08	74.0712	0	1	30	1
5	64	1	1	1	0	2a	2	0	1	2010-01-13	2017-03-25	86.4	0	2017-03-25	86.4	0	1	10	0	BAC
6	79	2	0	1	0	1c	1	0	1	2010-01-15	2016-01-20	72.1973	0	2016-01-20	72.1973	0	1	5	0
7	74	2	1	0	0	2a	2	0	1	2010-01-15	2011-09-01	19.5288	1	2011-12-16	23.0137	1		25	1
10	62	1	1	1	1	1c	1	0	1	2010-01-20	2018-02-01	96.4603	0	2018-02-01	96.4603	0		20	1
11	74	2	1	1	0	1b	1	0	1	2010-01-22	2018-10-11	104.679	0	2018-10-11	104.679	0		5	0
12	66	1	1	1	0	3	3	1	3	2010-01-22	2011-12-22	22.9808	1	2012-12-28	35.211	1		20	1
13	84	2	0	1	0	1c	1	0	1	2010-01-25	2016-03-08	73.4466	1	2016-03-08	73.4466	1		20	1
14	62	1	0	1	1	1c	1	0	1	2010-01-27	2018-01-09	95.474	0	2018-01-09	95.474	0		10	0
16	71	2	0	1	0	3	3	0	2	2010-01-29	2010-10-14	8.48219	1	2010-10-14	8.48219	1		30	1
19	81	2	0	1	0	4	4	0	3	2010-02-05	2017-03-24	85.611	0	2017-03-24	85.611	0	1	15	0
22	62	1	0	0	0	1b	1	0	1	2010-02-12	2018-02-15	96.1644	0	2018-02-15	96.1644	0		5	0
24	75	2	0	0	0	1b	1	0	1	2010-02-17	2010-10-10	7.72603	1	2010-10-10	7.72603	1		25	1
25	60	1	0	1	0	1a	1	0	1	2010-02-19	2017-03-29	85.3151	0	2017-03-29	85.3151	0		0	0
26	64	1	0	0	0	1b	1	0	1	2010-02-22	2012-05-29	27.189	1	2014-12-01	57.3041	1		20	1
27	75	2	1	1	1	2b	2	0	2	2010-02-22	2018-02-22	96.0658	0	2018-02-22	96.0658	0		10	0
28	71	2	0	1	0	1c	1	0	1	2010-02-26	2017-04-02	85.2164	0	2017-04-02	85.2164	0		0	0
30	64	1	1	1	1	2a	2	0	1	2010-03-01	2018-02-27	96	0	2018-02-27	96	0		15	0
35	77	2	0	0	0	3	3	0	2	2010-03-19	2018-03-08	95.7041	0	2018-03-08	95.7041	0		25	1
36	64	1	0	2	0	2a	2	1	2	2010-03-24	2011-04-21	12.9205	1	2011-08-05	16.4055	1		5	0
37	72	2	0	1	0	2a	2	1	2	2010-03-26	2018-05-31	98.2356	0	2018-05-31	98.2356	0		15	0
38	80	2	1	2	0	2b	2	0	2	2010-03-26	2012-09-05	29.3918	1	2014-10-08	54.4767	1		25	1
39	67	1	0	1		1c	1	0	1	2010-03-29	2018-07-05	99.2877	0	2018-07-05	99.2877	0		5	0
40	63	1	1	1	1	1b	1	0	1	2010-03-29	2018-03-15	95.6055	0	2018-03-15	95.6055	0		5	0
41	77	2	0	1	0	2a	2	0	1	2010-04-02	2014-01-01	45.0411	1	2014-06-13	50.4	1		30	1
42	76	2	1	1	1	1c	1	0	1	2010-04-02	2018-06-14	98.4658	0	2018-06-14	98.4658	0		30	1
45	78	2	0	1	0	2a	2	0	1	2010-04-09	2017-03-15	83.2438	0	2017-03-15	83.2438	0	1	5	0
46	68	1	0	1	1	2a	2	0	1	2010-04-09	2018-04-19	96.3945	0	2018-04-19	96.3945	0		0	0
48	76	2	1	1	0	2a	2	2	3	2010-04-12	2014-01-22	45.4027	1	2014-01-22	45.4027	1		30	1
49	79	2	1	0	0	4	4	0	3	2010-04-14	2011-05-10	12.8548	1	2013-01-24	33.4027	1		25	1
50	74	2	0	1	1	2a	2	0	1	2010-04-16	2016-07-08	74.7945	1	2016-07-08	74.7945	1		0	0
51	59	1	0	1	1	1c	1	0	1	2010-04-19	2011-01-07	8.64658	1	2011-01-07	8.64658	1		5	0
52	65	1	1	1	1	2a	2	0	1	2010-04-21	2012-12-25	32.1863	1	2016-08-16	75.9123	1		5	0
53	56	1	1	1	0	2a	2	0	1	2010-04-23	2018-03-22	95.0137	0	2018-03-22	95.0137	0		5	0
54	48	0	0	1	0	1b	1	0	1	2010-04-23	2018-04-12	95.7041	0	2018-04-12	95.7041	0		20	1
55	67	1	1	1	1	2a	2	0	1	2010-04-28	2012-07-04	26.2356	1	2018-10-17	101.721	0		5	0
60	70	1	0	0	0	2b	2	0	2	2010-05-10	2015-08-21	63.4192	1	2015-08-21	63.4192	1		5	0
61	67	1	1	1	0	2b	2	0	2	2010-05-17	2017-06-26	85.3808	0	2017-06-26	85.3808	0		25	1
62	77	2	0	0	0	2a	2	0	1	2010-05-17	2014-09-14	51.9781	1	2014-09-14	51.9781	1		25	1
63	85	2	0	2	0	2a	2	0	1	2010-05-19	2015-11-21	66.1479	1	2015-11-21	66.1479	1		10	0
66	62	1	0	0	0	2b	2	0	2	2010-05-26	2017-01-31	80.2849	0	2017-01-31	80.2849	0		30	1
67	72	2	0	0	0	3	3	0	2	2010-05-28	2012-09-21	27.8466	1	2013-02-03	32.2849	1		25	1
69	68	1	0	1	1	2a	2	0	1	2010-06-02	2017-07-25	85.8082	0	2017-07-25	85.8082	0		10	0
71	63	1	0	1	0	3	3	1	3	2010-06-07	2018-09-19	99.4849	0	2018-09-19	99.4849	0		20	1
74	47	0	1	1	0	1c	1	0	1	2010-06-16	2015-08-12	61.9068	0	2015-08-12	61.9068	0	1	30	1
75	70	1	0	1	0	2b	2	1	2	2010-06-18	2010-11-19	5.06301	1	2012-05-06	22.6192	1		30	1
79	35	0	1	1	1	1a	1	0	1	2010-06-25	2014-11-04	52.3726	1	2017-01-02	78.3452	1		5	0
83	70	1	0	1	1	2a	2	1	2	2010-07-05	2012-03-01	19.8904	1	2018-05-07	94.126	0	1	10	0
84	62	1	1	0	0	1a	1	0	1	2010-07-07	2013-10-08	39.0904	1	2015-05-16	58.3233	1		30	1
86	63	1	0	1	0	1c	1	0	1	2010-07-14	2018-07-17	96.1644	0	2018-07-17	96.1644	0		25	1
92	65	1	0	0	0	2a	2	2	3	2010-08-02	2012-10-25	26.7945	1	2014-07-17	47.5068	1		30	1
94	69	1	1	1	0	3	3	1	3	2010-08-09	2012-04-10	20.0548	1	2018-07-13	95.1781	1		10	0	ALKf+
95	73	2	0	0	0	1b	1	0	1	2010-08-13	2013-12-08	39.8795	1	2013-12-08	39.8795	1		25	1
97	54	0	0	1	0	1b	1	0	1	2010-08-20	2018-10-18	98.0055	0	2018-10-18	98.0055	0		10	0
98	70	1	0	0	0	1c	1	0	1	2010-08-23	2014-08-14	47.737	1	2014-11-25	51.1233	0	1	30	1
101	74	2	1	1	0	2a	2	0	1	2010-08-30	2012-08-21	23.737	1	2018-01-16	88.6356	0		10	0
102	59	1	0	2	0	2a	2	0	1	2010-08-30	2018-09-27	96.9863	0	2018-09-27	96.9863	0		5	0
103	63	1	0	0	0	2a	2	0	1	2010-09-01	2018-09-11	96.3945	0	2018-09-11	96.3945	0		25	1
108	76	2	0	1	1	1b	1	0	1	2010-09-17	2016-09-15	72	0	2016-09-15	72	0	1	0	0
109	66	1	1	1	1	2a	2	0	1	2010-09-17	2012-05-21	20.1205	1	2018-03-21	90.1479	1		5	0
110	67	1	0	1	0	1b	1	0	1	2010-09-24	2018-09-20	95.9342	0	2018-09-20	95.9342	0		10	0
111	75	2	0	0	0	1c	1	0	1	2010-09-27	2017-10-20	84.8219	0	2017-10-20	84.8219	0		10	0
112	75	2	1	1	1	1b	1	0	1	2010-09-29	2017-12-06	86.3014	0	2017-12-06	86.3014	0		0	0
113	72	2	0	1	0	2a	2	1	2	2010-10-06	2018-10-23	96.6247	0	2018-10-23	96.6247	0		10	0
115	69	1	0	0	0	3	3	0	2	2010-10-10	2018-10-22	96.4603	0	2018-10-22	96.4603	0		5	0
116	64	1	0	0	0	1c	1	1	2	2010-10-13	2018-10-25	96.4603	0	2018-10-25	96.4603	0		25	1
117	70	1	1	1	1	1b	1	0	1	2010-10-15	2018-10-09	95.8685	0	2018-10-09	95.8685	0		5	0
118	72	2	0	1	0	2a	2	1	2	2010-10-15	2012-04-19	18.1479	1	2013-02-28	28.5041	1		0	0
119	65	1	1	1	1	2a	2	0	1	2010-10-18	2014-10-16	47.9671	1	2016-11-16	73.0192	0	1	15	0
120	61	1	1	1	1	2a	2	0	1	2010-10-20	2018-10-16	95.9342	0	2018-10-16	95.9342	0		0	0
121	62	1	0	1	1	1b	1	0	1	2010-10-22	2018-11-01	96.3945	0	2018-11-01	96.3945	0		5	0
123	69	1	1	2	0	2a	2	0	1	2010-10-25	2018-06-07	91.463	0	2018-06-07	91.463	0		25	1
125	48	0	1	1	0	2a	2	0	1	2010-10-29	2018-10-25	95.9342	0	2018-10-25	95.9342	0		25	1
126	76	2	0	1	1	2a	2	0	1	2010-11-01	2017-10-24	83.8027	1	2018-03-16	88.5041	1		25	1
129	72	2	0	1	0	2a	2	0	1	2010-11-08	2017-12-13	85.2164	0	2017-12-13	85.2164	0		25	1
130	75	2	0	0	0	2b	2	1	2	2010-11-10	2011-04-26	5.49041	1	2012-09-13	22.126	1		30	1
131	70	1	0	0	0	3	3	1	3	2010-11-12	2011-03-18	4.14247	1	2014-04-20	41.2603	1		30	1
132	79	2	0	1	0	2a	2	0	1	2010-11-15	2017-12-09	84.8548	0	2017-12-09	84.8548	0		5	0
138	83	2	0	1	0	3	3	0	2	2010-11-26	2011-09-13	9.56712	1	2012-08-06	20.3507	1		25	1
143	84	2	0	1	0	2a	2	0	1	2010-12-10	2016-02-18	62.3342	1	2016-02-18	62.3342	1		30	1
144	62	1	0	0	0	2a	2	1	2	2010-12-13	2017-05-02	76.6685	0	2017-05-02	76.6685	0	1	20	1
145	74	2	0	1	0	1b	1	0	1	2010-12-15	2011-06-16	6.01644	1	2011-09-29	9.46849	0	1	5	0
146	83	2	0	0	0	2a	2	0	1	2010-12-17	2015-12-10	59.8027	0	2015-12-10	59.8027	0	1	25	1
148	54	0	0	0	0	4	4	0	3	2010-12-20	2018-10-19	94.0274	0	2018-10-19	94.0274	0		25	1
149	55	0	1	2	0	1b	1	0	1	2010-12-24	2017-12-21	83.9671	0	2017-12-21	83.9671	0		25	1	Mucoepidermoid Ca
150	69	1	1	1	0	4	4	2	3	2010-12-27	2011-03-02	2.13699	1	2012-05-13	16.537	1		0	0
151	26	0	1	1	0	3	3	0	2	2010-12-27	2011-12-15	11.6055	1	2013-12-26	36	1		15	0
