# Supplementary material for: Meflin-positive cancer-associated fibroblasts enhance tumor response to immune checkpoint blockade
Source: Life Sci Alliance. 2022 Mar 1;5(6):e202101230. doi: 10.26508/lsa.202101230 (PMC8897596; doi:10.26508/lsa.202101230)
Supplement: Supplementary file 4 [file LSA-2021-01230_SdataF4.xlsx]

## Sheet: B
ID	%Meflin
1	25
2	10
3	30
4	15
5	5
6	<5
7	25
8	<5
9	20
11	25
13	30
14	30
15	<5
16	30
17	30
18	30
19	30
20	15
21	30
22	20
23	30
24	20
25	<5
26	30
28	30
29	5
32	30
33	20
34	25
36	30
37	<5
38	25
39	<5
44	10
45	20
46	30
47	30
50	30
52	10
53	15
54	10
61	30
62	30
63	30
64	5
65	25
68	30
69	20
70	<5
71	30
72	20
74	<5
76	25
77	25
78	30
83	30
84	20
85	20
86	20
89	<5
90	20
91	30
95	30
96	25
97	15
99	20
100	20
101	10
103	20
104	30
105	30
106	<5
107	20
108	25
109	30
110	10
111	15
121	20
122	25
123	30
124	30
129	30
130	5
133	10
134	15
135	10
136	10
138	5
139	10
140	30
142	10
143	5
144	25
146	25
147	<5
148	20
149	10
150	30

## Sheet: C
	%	H/L	Meflin	Neg	Total	%	Fields	Total Fibro/1HPF
1	25	1	387	953	1340	28.8806	4	335
3	30	1	502	472	974	51.54	4	243.5
7	25	1	295	875	1170	25.2137	4	292.5
11	25	1	288	783	1071	26.8908	4	267.75
13	30	1	504	403	907	55.5678	4	226.75
16	30	1	440	428	868	50.6912	4	217
19	30	1	241	454	695	34.6763	4	173.75
21	30	1	281	440	721	38.9736	4	180.25
24	20	1	101	381	482	20.9544	4	120.5
28	30	1	472	406	878	53.7585	3	292.667
32	30	1	234	499	733	31.9236	4	183.25
34	25	1	240	670	910	26.3736	3	303.333
36	30	1	250	553	803	31.1333	4	200.75
39	<5	0	55	1054	1109	4.95942	4	277.25
46	30	1	226	441	667	33.8831	4	166.75
47	30	1	149	342	491	30.3462	4	122.75
52	10	0	62	541	603	10.2819	3	201
54	10	0	43	282	325	13.2308	4	81.25
63	30	1	429	465	894	47.9866	4	223.5
68	30	1	450	632	1082	41.5896	4	270.5
89	<5	0	1	552	553	0.180832	3	184.333
91	30	1	227	266	493	46.0446	4	123.25
95	30	1	390	592	982	39.7149	4	245.5
96	25	1	184	521	705	26.0993	4	176.25
97	15	0	100	565	665	15.0376	4	166.25
105	30	1	134	240	374	35.8289	3	124.667
109	30	1	328	730	1058	31.0019	4	264.5
121	20	1	155	552	707	21.9236	4	176.75
123	30	1	155	349	504	30.754	4	126
124	30	1	226	470	696	32.4713	4	174
133	10	0	84	717	801	10.4869	4	200.25
135	10	0	171	1093	1264	13.5285	4	316
136	10	0	66	555	621	10.628	4	155.25
140	30	1	400	531	931	42.9646	4	232.75
142	10	0	60	485	545	11.0092	4	136.25
146	25	1	288	696	984	29.2683	4	246
147	<5	0	50	1012	1062	4.7081	4	265.5
149	10	0	71	463	534	13.2959	4	133.5

## Sheet: D-F
ID	%Meflin	Meflin H/L	Age	Sex	ST	EGFRm	PD-L1	Late3	PFS	OS	Prog	death	Good-PS	BI	Res	DC+	PCiTB
1	25	1	74	1	1	1	1	1	0.756164	1.61096	1	1	0	0	0	0	1
2	10	0	59	0	0		2	1	0.131507	0.460274	1	1	0	1	0	0	24
3	30	1	72	1	1	1	1	1	2.46575	22.4219	1	1	1	0	0	0	4
4	15	0	69	1	1	1	1	1	1.38082	13.1836	1	1	1	0	0	0	6
5	5	0	62	0	1	0	1	1	0.854795	1.80822	1	1	0	1	0	0	31
6	<5	0	71	0	1	0	1	1	3.3863	4.33973	1	1	1	1	0	1	-18
7	25	1	74	1	1	1	1	0	1.61096	16.0438	1	1	1	0	0	0	15
8	<5	0	52	0	1	0	1	0	0.821918	2.4	1	1	0	1	0	0	12
9	20	1	79	0	0	0	2	0	45.5671	49.4795	0	0	1	1	1	1	-59
11	25	1	53	0	2	0	2	1	14.0712	45.337	1	1	1	1	1	1	-71
13	30	1	59	0	1	1	2	0	1.18356	4.96438	1	1	1	1	0	0	-4
14	30	1	53	0	1	0	2	0	0.263014	2.76164	1	1	1	0	0	0	3
15	<5	0	60	1	1	1	1	1	1.34795	21.1068	1	0	1	0	0	0	0
16	30	1	73	0	0		0	1	11.3753	11.3753	1	1	1	0	1	1	-67
17	30	1	74	1	1	1	0	0	5.98356	21.6	1	1	1	0	1	1	-35
18	30	1	70	0	0		0	1	11.8685	37.9726	1	0	1	1	0	1	0
19	30	1	51	1	1	0	0	0	14.7288	45.4027	1	0	1	0	0	1	15
20	15	0	66	0	1		0	1	1.4137	8.6137	1	1	1	0	0	0	15
21	30	1	68	0	2	0	2	0	1.74247	4.47123	1	1	1	0	0	0	23
22	20	1	65	0	1	0	1	0	0.690411	7.7589	1	1	1	1	0	0	22
23	30	1	66	1	1	0	1	0	4.3726	8.6137	1	1	1	0	0	1	13
24	20	1	72	0	1	0	0	1	39.189	41.2932	0	1	1	1	1	1	-89
25	<5	0	43	0	2	0	1	0	1.4137	9.33699	1	1	1	1	0	0	33
26	30	1	42	0	1	1	1	0	0.920548	1.8411	1	1	1	0	0	0	23
28	30	1	73	0	0	0	0	0	9.89589	23.474	1	0	1	1	0	1	-7
29	5	0	73	0	1	1	2	1	11.7041	17.1288	1	1	1	0	0	1	-25
32	30	1	62	0	0		1	0	1.31507	9.76438	1	1	1	0	0	0	20
33	20	1	73	0	1	0	0	1	6.14795	30.5425	0	1	1	1	1	1	-56
34	25	1	76	0	0	0	0	0	9.6	39.1233	1	0	1	1	1	1	-89
36	30	1	44	1	1	0	2	1	0.394521	0.854795	1	1	0	1	0	0	34
37	<5	0	72	1	2	0	0	1	0.394521	3.94521	1	1	0	1
38	25	1	50	0	1	0	0	1	1.15068	23.6384	1	1	1	1	0	0	25
39	<5	0	71	0	2	0	0	0	4.86575	36.0986	1	0	1	1	0	1	22
44	10	0	72	0	1	0	0	0	1.21644	3.22192	1	1	0	1	0	0	0
45	20	1	65	0	0	0	1	0	0.986301	5.68767	1	1	1	1	0	0	22
46	30	1	55	0	1	0	0	1	2.56438	32.9425	1	0	1	1	0	0	59
47	30	1	57	0	2	0	0	1	2.43288	9.69863	1	1	1	1	0	0	18
50	30	1	59	0	0		1	0	3.35342	5.62192	1	1	0	1	0	1	-11
52	10	0	46	0	1	0	1	1	3.64932	16.8658	1	0	1	0	0	0	-17
53	15	0	74	1	1	1	0	1	6.44384	16.3726	1	0	1	0	0	1	-8
54	10	0	65	0	0		1	1	5.29315	25.0849	1	0	1	1	0	1	-10
61	30	1	55	0	1	0	2	0	17.063	24.4932	1	1	1	1	1	1	-100
62	30	1	72	1	1	1	1	0	3.02466	36.4932	1	0	1	0	0	0	-2
63	30	1	75	0	0		2	0	2.23562	12.0658	1	1	1	1	0	0	1
64	5	0	49	0	2	0	2	1	5.52329	11.1123	1	1	1	1	0	1	-15
65	25	1	56	1	1	0	2	0	0.887671	4.04384	1	1	0	0	0	0	11
68	30	1	77	0	0		1	0	16.9644	29.6877	1	0	1	1	1	1	-44
69	20	1	77	0	0	0	2	0	8.31781	27.2877	1	0	1	1	1	1	-34
70	<5	0	64	0	2	0	2	0	1.4137	1.4137	1	1	1	1
71	30	1	74	0	0		2	0	4.89863	16.1425	1	0	1	1	0	1	14
72	20	1	63	1	1	0	2	0	32.3836	34.2247	0	0	1	1	1	1	-100
74	<5	0	78	0	1	0	2	0	6.6411	31.6603	1	0	1	0	0	1	-3
76	25	1	45	0	0	0	2	0	1.8411	3.78082	1	1	1	0	1	1	-45
77	25	1	73	0	1	0	1	0	3.68219	11.737	1	1	0	1	1	1	-33
78	30	1	74	0	1	1	1	0	18.4438	19.2658	1	1	1	0	1	1	-100
83	30	1	69	0	1	0	1	0	5.95068	16.8	1	0	1	1	0	1	-17
84	20	1	71	0	2	0	1	0	8.02192	22.9808	1	0	1	1	1	1	-31
85	20	1	77	1	1	0	2	0	5.29315	29.2274	1	0	1	1	1	1	-36
86	20	1	58	1	1	0	1	1	1.38082	5.88493	1	1	0	0	0	0	53
89	<5	0	70	1	1	0	1	1	25.4795	26.8603	0	0	1	1	0	1	-10
90	20	1	72	0	0		2	0	4.89863	8.31781	1	1	1	1	1	1	-34
91	30	1	60	1	2	0	2	0	0.493151	6.6411	1	1	1	0	0	0	8
95	30	1	73	0	0		2	0	20.9425	23.2438	0	0	1	1	1	1	-50
96	25	1	75	0	2	0	2	0	17.063	22.1589	1	0	1	1	1	1	-52
97	15	0	80	0	1	0	2	0	0.427397	0.821918	1	1	0	1	0	0	25
99	20	1	85	1	1	0	2	0	15.2877	20.4493	1	0	1	0	0	1	-32
100	20	1	77	1	1	0	2	0	5.58904	19.5288	1	0	1	0	0	1	13
101	10	0	63	0	1	0	2	0		0.854795		1	0	1
103	20	1	82	0	1	0	2	0	17.2603	17.7534	0	0	1	1	1	1	-100
104	30	1	68	1	1	0	2	0	1.4137	8.28493	1	1	1	0	0	0	17
105	30	1	60	1	1	0	2	0		1.80822		1	0	0
106	<5	0	74	1	1	0	2	1	0.29589	0.690411	1	1	0	1	0	0	30
107	20	1	71	1	2	0	2	0	17.2932	17.2932	0	0	1	1	1	1	-100
108	25	1	57	0	1	0	2	0	4.43836	16.2082	1	0	1	1	0	1	-8
109	30	1	67	0	0	0	2	0	15.4849	16.1753	0	0	1	1	1	1	-39
110	10	0	71	0	0		2	0	0.887671	3.8137	1	1	1	1	0	0	32
111	15	0	79	0	1		1	0	5.85205	7.92329	1	0	1	1	0	1	7
121	20	1	73	0	0	0	1	0	12.1644	28.4384	1	0	1	1	1	1	-100
122	25	1	71	1	1	1		0	13.1507	40.1096	1	1	1	0	1	1	-62
123	30	1	63	0	2	0	2	0	23.6384	36.5918	1	0	1	1	0	1	0
124	30	1	60	0	1	0		0	37.7753	37.9068	0	0	1	1	1	1	-39
129	30	1	72	0	1	0	0	1	10.389	22.7178	1	0	1	1	0	1	2
130	5	0	69	0	1	0	1	0	2.26849	6.83836	1	1	1	1	0	0	21
133	10	0	60	1	1	1		1	0.756164	5.52329	1	1	1	0	0	0	7
134	15	0	69	0	1	0	1	0	5.09589	21.9288	1	1	1	1	0	0	-4
135	10	0	66	1	1	0	1	1	1.54521	8.21918	1	1	1	0	0	0	-4
136	10	0	77	1	1	1	0	1	0.460274	5.45753	1	0	1	0	0	0	21
138	5	0	54	0	1	1	1	1	0.624658	5.65479	1	1	1	0	0	0	60
139	10	0	63	1	1	1	2	1	1.08493	7.13425	1	1	1	0	0	0	35
140	30	1	76	0	1	1	0	1	5.68767	16.7342	1	0	1	1	0	1	-13
142	10	0	64	0	1	0	1	0	9.63288	16.1096	1	0	1	1	0	1	-23
143	5	0	79	0	1	0	1	0	6.34521	16.2411	1	0	1	1	0	1	-6
144	25	1	67	1	1	0	0	1	1.4137	5.62192	1	1	1	0	0	0	23
146	25	1	49	1	1	0	1	0	1.34795	18.1808	0	1	1	0	0	0	-14
147	<5	0	68	1	1	0	0	0	7.29863	9.83014	1	0	1	1	0	1	-12
148	20	1	55	1	2	0	0	1	1.4137	1.9726	1	1	0	0	0	0	43
149	10	0	80	0	1	0	1	1	8.87671	9.20548	0	0	1	1	0	1	4
150	30	1	75	1	1	1	0	1	2.76164	7.39726	1	0	1	0	0	0	22
