# Supplementary material for: Meflin-positive cancer-associated fibroblasts enhance tumor response to immune checkpoint blockade
Source: Life Sci Alliance. 2022 Mar 1;5(6):e202101230. doi: 10.26508/lsa.202101230 (PMC8897596; doi:10.26508/lsa.202101230)
Supplement: Supplementary file 5 [file LSA-2021-01230_SdataF5.xlsx]

## Sheet: A_CD4+inTumor
High	Low
0.40282	2.15695
2.43292	4.38936
2.60128	0.465465
2.80472	0.932592
1.20416	0.112233
1.38083	0.304569
2.83308	0.80402
14.6119
0.811808
1.96943
5.12232
0.225822
1.06007
0.673887
6.68335
0.45045
1.34992
0.780234
2.97545
4.4586
3.06208
4.36548
0.944291
8.46239
3.00842

## Sheet: A_CD4+inStroma
High	Low
3.78007	2.51828
7.50988	10.4944
1.69337	2.7321
12.2412	3.42081
5.90395	1.03396
4.67472	2.0943
4.96074	1.6157
15.797
6.57111
10.5816
12.6135
3.02031
4.81006
2.88485
8.49937
3.18661
8.37894
1.00063
6.07116
11.1319
2.9791
8.79775
12.371
12.8689
3.38954

## Sheet: A_CD8+inTumor
High	Low
0.503525	2.52409
8.91314	10.075
4.00853	2.76276
4.32503	7.39529
1.86097	1.09989
2.20933	4.46701
4.63247	12.6633
21.9178
4.15393
13.3451
5.73395
0.716399
7.95053
23.4416
13.6883
3.82883
2.69984
4.29129
21.5596
9.12951
29.9497
16.5482
10.3377
27.1018
1.92539

## Sheet: A_CD8+inStroma
High	Low
2.20222	1.52303
13.4295	14.9796
2.34117	4.90246
8.0951	14.0442
4.74576	4.6763
3.0128	5.34539
3.9112	10.264
19.4486
14.0243
9.75519
7.4273
1.56091
10.5493
29.671
15.9234
22.9814
6.47826
1.63166
14.0464
9.1359
28.0386
15.6937
18.0741
38.3633
2.55493

## Sheet: A_Treg_CD4+inTumor
High	Low
0	2.12766
13.0841	2.07254
1.63934	6.45161
11.2149	0.877193
4.54545	0
0	55.5556
10.8108	0
11.4583
19.4805
0
0
20.6897
16.6667
10.7143
12.8342
0
6.42857
0
26.6667
16.6667
16.4384
9.30233
4.80349
11.1111
2

## Sheet: A_Treg_CD4+inStroma
High	Low
0	1.94611
18.1151	2.00708
2.68456	10.6542
7.43723	2.01005
2.87081	3.40909
1.14068	22.5131
10.9589	4.46429
9.41508
18.1208
1.05696
1.32159
19.7479
21.875
26.5957
16.6346
8.47458
2.019
1.8018
19.1756
8.5277
5.04202
6.57895
9.02873
16.3121
4.27136

## Sheet: B_CD31
High	Low
1.07467	0.256333
1.55267	0.267333
1.85067	0.051667
1.18433	0.088333
0.492333	0.088333
0.830667	0.950667
0.622333	0.776
1.50833
0.969333
1.07233
0.552
0.068667
0.772
0.224333
0.567
1.103
3.707
3.40833
2.188
2.17467
2.91833
0.069333
1.12767
0.3925
1.33667
